# Supplementary material for: Anti-Cancer Drugs Elicit Re-Expression of UDP-Glucuronosyltransferases in Melanoma Cells
Source: PubMed Central journal article supplement (PMC3478267; doi:10.1371/journal.pone.0047696), 2012-10-22

Figure S2

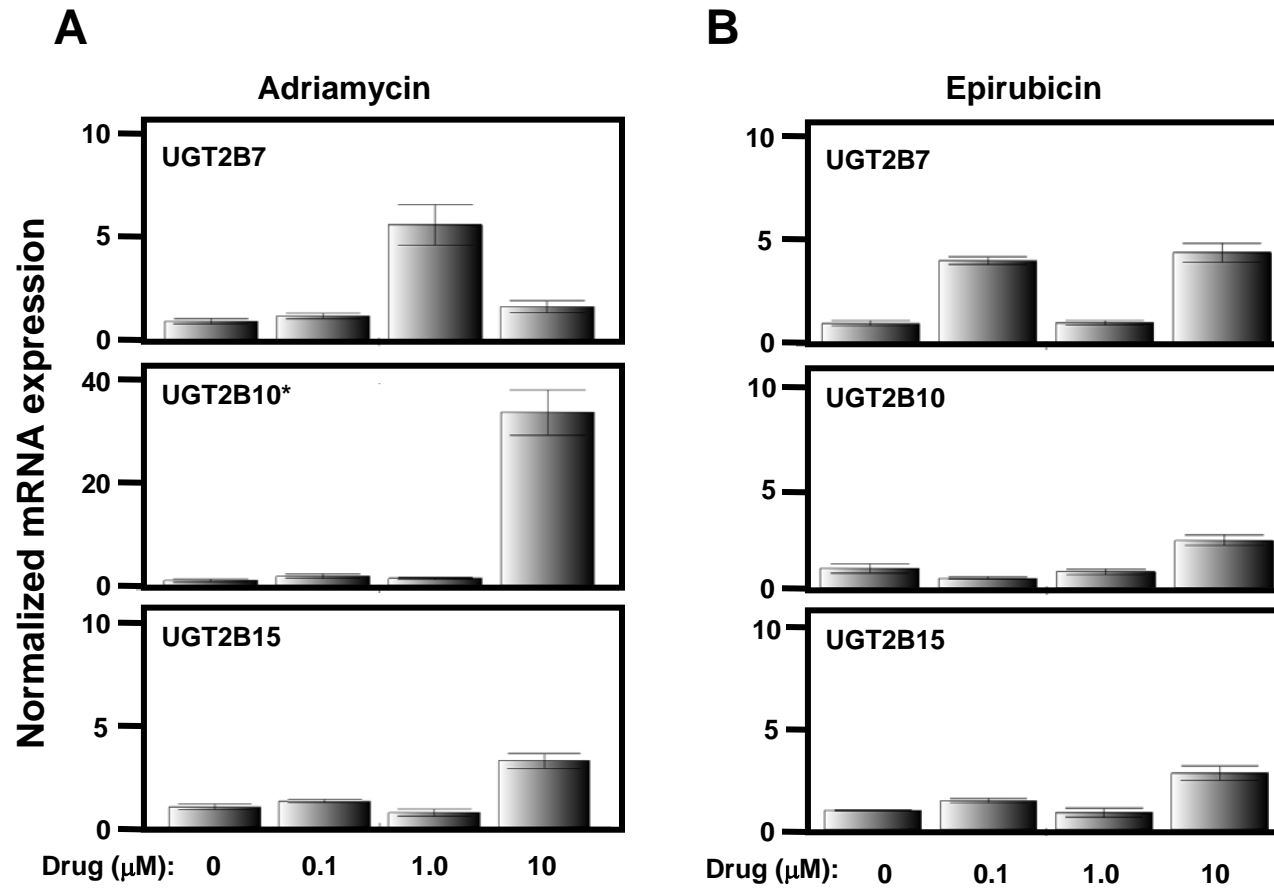

Supplement: pone.0047696.s002.pdf [file pone.0047696.s002.pdf]
