# Supplementary material for: Anti-Cancer Drugs Elicit Re-Expression of UDP-Glucuronosyltransferases in Melanoma Cells
Source: PubMed Central journal article supplement (PMC3478267; doi:10.1371/journal.pone.0047696), 2012-10-22
Supplement: pone.0047696.s004.pdf [file pone.0047696.s004.pdf]

**Table S1**

Supplemental Table S1. Primers used in conventional PCR experiments

| <b>GENE</b> | <b>Sense Primer</b>                | <b>Anti-Sense Primer</b>     | <b>Expected Size (bps)</b> |
|-------------|------------------------------------|------------------------------|----------------------------|
| UGT2B4      | 5'-CTCTCCTGGCTACGCAA-3'            | 5'-TTTGCAGTGGAGTCCTCC-3'     | 326                        |
| UGT2B7      | 5'-CTTCTCTCCTGGCTACACTT-3'         | 5'-TTTGCAGTGGAGTCCTCC-3'     | 329                        |
| UGT2B10     | 5'-CTGGCTGAGCTATTTAACATACCC-3'     | 5'-CGCATAAGCCATATGTCAGC-3'   | 298                        |
| UGT2B11     | 5'-GACATCGTTTTTGCAGATGCTGT-3'      | 5'-CGCATAAGCCATATGTCAGC-3'   | 306                        |
| UGT2B15     | 5'-GTTGGGAATATTATGACTACAGTAAC-3'   | 5'-TTTGGTAAGAATGGGCGAG-3'    | 462                        |
| UGT2B17     | 5'-GTGTTGGGAATATTCTGACTATAATATA-3' | 5'-TTTGGTAAGAATGGGCGAG-3'    | 462                        |
| UGT2B28     | 5'-CAGTCTCTGCTTCACTCC-3'           | 5'-TTTGCAGTGGAGTCCTCC-3'     | 322                        |
| UGT1A       | 5'-TCCTGTGGCGGTACACTG-3'           | 5'-TCAATGGGTCTTGGATTTGTGG-3' | 600                        |
| GAPDH       | 5'-CCAGGGCTGCTTTTAACTC-3'          | 5'-GCTCCCCCTGCAAATGA-3'      | 291                        |
